# Supplementary material for: Enhancing the conversion of ethyl levulinate to γ-valerolactone over Ru/UiO-66 by introducing sulfonic groups into the framework
Source: Royal Society of Chemistry journal article supplement (doi:10.1039/c8ra01314d), 2018-01-01
Supplement: c8ra01314d1.pdf [file c8ra01314d1.pdf]

## Supporting Information

### **Enhancing the conversion of ethyl levulinate to $\gamma$ -valerolactone over Ru/UiO-66 by introducing sulfonic groups into the framework**

Jie Yang\*, Wenjuan Huang, Yongsheng Liu, Tao Zhou

School of Mathematics and Physics, Shanghai University of Electric Power,  
Shanghai, 200090, China

Correspondence: [yj\\_7667@aliyun.com](mailto:yj_7667@aliyun.com)

## **Synthesis of UiO-66 and its analogues**

### **Preparation of UiO-66**

ZrCl<sub>4</sub> (0.265 g) and 1,4-benzenedicarboxylic acid (H<sub>2</sub>BDC) (0.264 g) were dissolved in DMF (35 mL) at room temperature. The resulting mixture was placed in a Teflon-lined autoclave in a preheated oven at 120 °C for 3 day. After the solution was cooled to room temperature in air, the resulting solid was filtered and repeatedly washed with absolute ethanol for 3 days while heated at 60 °C in an oil bath. The resulting powder was filtered, and dried under vacuum at 50 °C.

### **Preparation of UiO-66-SO<sub>3</sub>H**

0.265 g of ZrCl<sub>4</sub> and 0.305 g of 2-NaSO<sub>3</sub>-H<sub>2</sub>BDC were dissolved in DMF (35 mL) at room temperature. 5 mL of acetic acid was added later. The resulting mixture was placed in a Teflon-lined autoclave in a preheated oven at 120 °C for 3 day. After the solution was cooled to room temperature in air, the resulting solid was filtered and repeatedly washed with absolute ethanol for 3 days while heated at 60 °C in an oil bath. The resulting powder was filtered, and dried under vacuum at 50 °C.

### **Preparation of UiO-66-NO<sub>2</sub>**

According to the literature, ZrCl<sub>4</sub>(0.75 g) and 2-nitro-benzenedicarboxylic acid (O<sub>2</sub>N-H<sub>2</sub>BDC) (0.676 g) were dissolved in DMF (90 mL) at room temperature. The resulting mixture was placed in a Teflon-lined autoclave in a preheated oven at 120 °C for 3 day. After the solution was cooled to room temperature in air, the resulting solid was filtered and repeatedly washed with absolute ethanol for 3 days while heated at 60 °C in an oil bath. The resulting powder was filtered, and dried under vacuum at 50 °C.

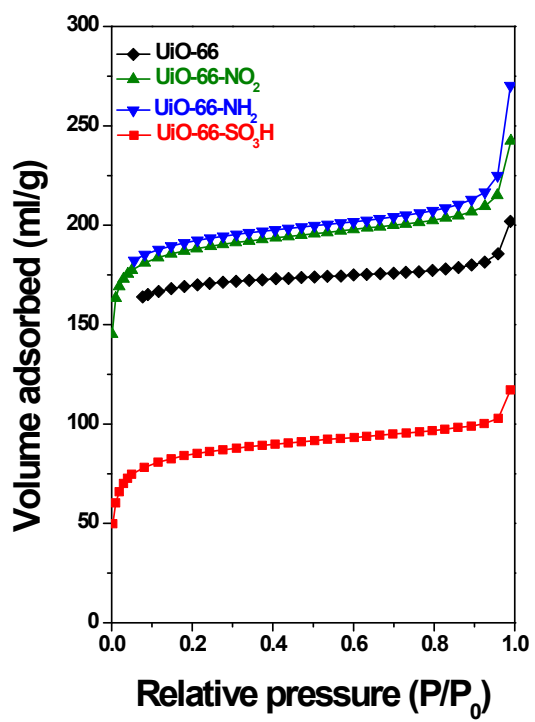

Fig.S1 N<sub>2</sub> adsorption isotherms of UiO-66 and UiO-66-X at 77K.

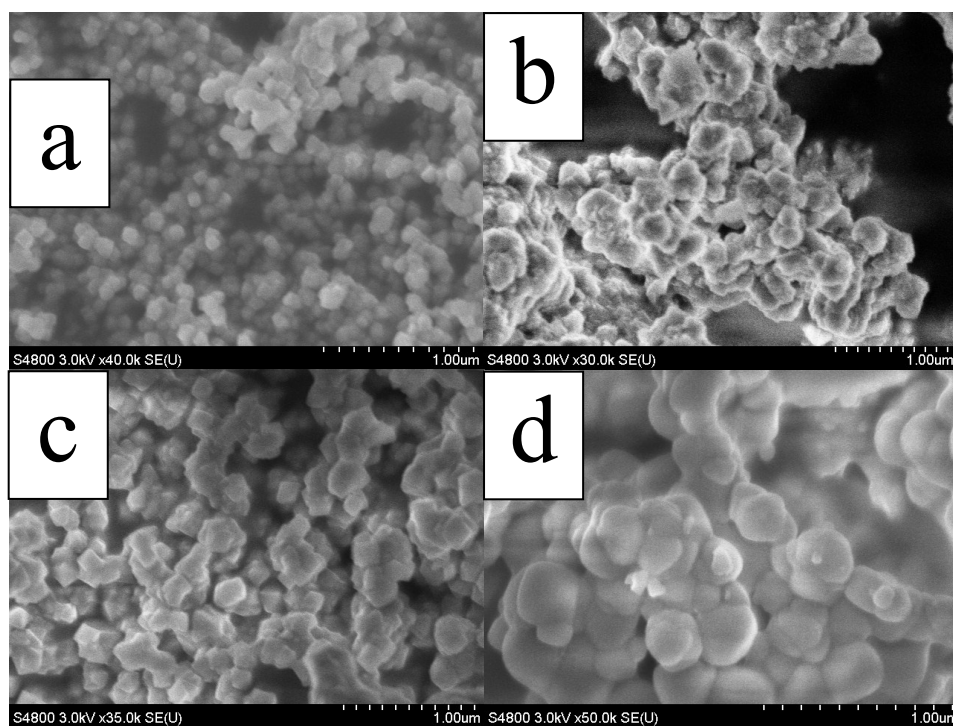

Figure S2 SEM images of UiO-66 and its functionalized analogues: (a) UiO-66, (b) UiO-66-NO<sub>2</sub>, (c) UiO-66-NH<sub>2</sub>, and (d) UiO-66-SO<sub>3</sub>H.

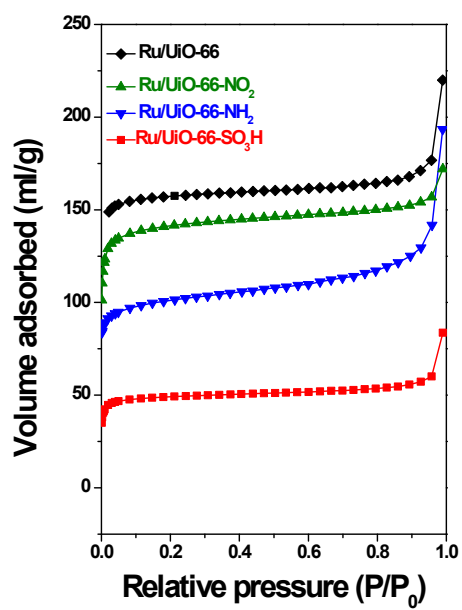

Fig. S3 N<sub>2</sub> adsorption isotherms of Ru/UiO-66 and Ru/UiO-66-X at 77K.

Table S1 Catalytic performance of Ru/UiO-66 and Ru/UiO-66-SO<sub>3</sub>H for EL hydrogenation in water. <sup>a</sup>

| Entry | Catalysts                   | Conv.(%) | Sel.(%) |     |    |
|-------|-----------------------------|----------|---------|-----|----|
|       |                             |          | GVL     | EHP | LA |
| 1     | Ru/UiO-66                   | 100      | 100     | 0   | 0  |
| 2     | Ru/UiO-66-SO <sub>3</sub> H | 100      | 100     | 0   | 0  |

<sup>a</sup> Reaction conditions: EL (0.34 mL), Ru/support (100 mg), solvent (9.6 mL), 80 °C, 5 h, H<sub>2</sub> 0.5MPa.
